# Supplementary material for: Chemo-enzymatic synthesis of key intermediates (S)-γ-hydroxymethyl-α,β-butenolide and (S)-γ-hydroxymethyl-γ-butyrolactone via lipase-mediated Baeyer–Villiger oxidation of levoglucosenone
Source: Royal Society of Chemistry journal article supplement (doi:10.1039/c4gc01231c), 2014-09-05

# Chemoenzymatic synthesis of key lactones (*S*)- $\gamma$ -hydroxymethyl- $\alpha,\beta$ -butenolide and (*S*)- $\gamma$ -hydroxymethyl- $\gamma$ -butyrolactone *via* lipase-mediated Baeyer-Villiger oxidation of levoglucosenone

A. L. Flourat,<sup>§a,b,c</sup> A. A. M. Peru,<sup>§a,b,c</sup> A. R. S. Teixeira,<sup>a,d,e</sup> F. Brunissen,<sup>a,b,c</sup> and F. Allais<sup>\*a,f,g</sup>

<sup>a</sup> AgroParisTech, Chaire Agro-Biotechnologies Industrielles (ABI), 247 rue Paul Vaillant-Couturier F-51100 Reims, France.

<sup>b</sup> AgroParisTech, UMR 1318 IJPB, Route de Saint-Cyr F-78026 Versailles, France.

<sup>c</sup> INRA, UMR 1318 IJPB, Route de Saint-Cyr F-78026 Versailles, France.

<sup>d</sup> AgroParisTech, UMR 1145 GENIAL, 1 avenue des Olympiades, F-91744 Massy, France.

<sup>e</sup> INRA, UMR 1145 GENIAL, 1 avenue des Olympiades, F-91744 Massy, France.

<sup>f</sup> AgroParisTech, UMR 782 GMPA, Site de Grignon, F-78850 Thiverval-Grignon, France.

<sup>g</sup> INRA, UMR 782 GMPA, Site de Grignon, F-78850 Thiverval-Grignon, France.

<sup>§</sup> the authors contributed equally to this work

\* Prof. Florent Allais, [florent.allais@agroparistech.fr](mailto:florent.allais@agroparistech.fr)

## Electronic Supplementary Information (ESI)

|                                                                                                                               |            |
|-------------------------------------------------------------------------------------------------------------------------------|------------|
| <b><sup>1</sup>H NMR spectrum of industrial grade levoglucosenone (LGO)</b>                                                   | <b>S2</b>  |
| <b><sup>13</sup>C NMR spectrum of industrial grade levoglucosenone (LGO)</b>                                                  | <b>S3</b>  |
| <b>FT-IR spectrum of (<i>S</i>)-<math>\gamma</math>-hydroxymethyl-<math>\alpha,\beta</math>-butenolide (HBO)</b>              | <b>S4</b>  |
| <b><sup>1</sup>H NMR spectrum of (<i>S</i>)-<math>\gamma</math>-hydroxymethyl-<math>\alpha,\beta</math>-butenolide (HBO)</b>  | <b>S5</b>  |
| <b><sup>13</sup>C NMR spectrum of (<i>S</i>)-<math>\gamma</math>-hydroxymethyl-<math>\alpha,\beta</math>-butenolide (HBO)</b> | <b>S6</b>  |
| <b>FT-IR spectrum of 2,3-dehydro levoglucosenone (2H-LGO)</b>                                                                 | <b>S7</b>  |
| <b><sup>1</sup>H NMR spectrum of 2,3-dehydro levoglucosenone (2H-LGO)</b>                                                     | <b>S8</b>  |
| <b><sup>13</sup>C NMR spectrum of 2,3-dehydro levoglucosenone (2H-LGO)</b>                                                    | <b>S9</b>  |
| <b>FT-IR spectrum of (<i>S</i>)-<math>\gamma</math>-hydroxymethyl-<math>\gamma</math>-butyrolactone (2H-HBO)</b>              | <b>S10</b> |
| <b><sup>1</sup>H NMR spectrum of (<i>S</i>)-<math>\gamma</math>-hydroxymethyl-<math>\gamma</math>-butyrolactone (2H-HBO)</b>  | <b>S11</b> |
| <b><sup>13</sup>C NMR spectrum of (<i>S</i>)-<math>\gamma</math>-hydroxymethyl-<math>\gamma</math>-butyrolactone (2H-HBO)</b> | <b>S12</b> |

# <sup>1</sup>H NMR spectrum of industrial grade levoglucosenone (LGO)

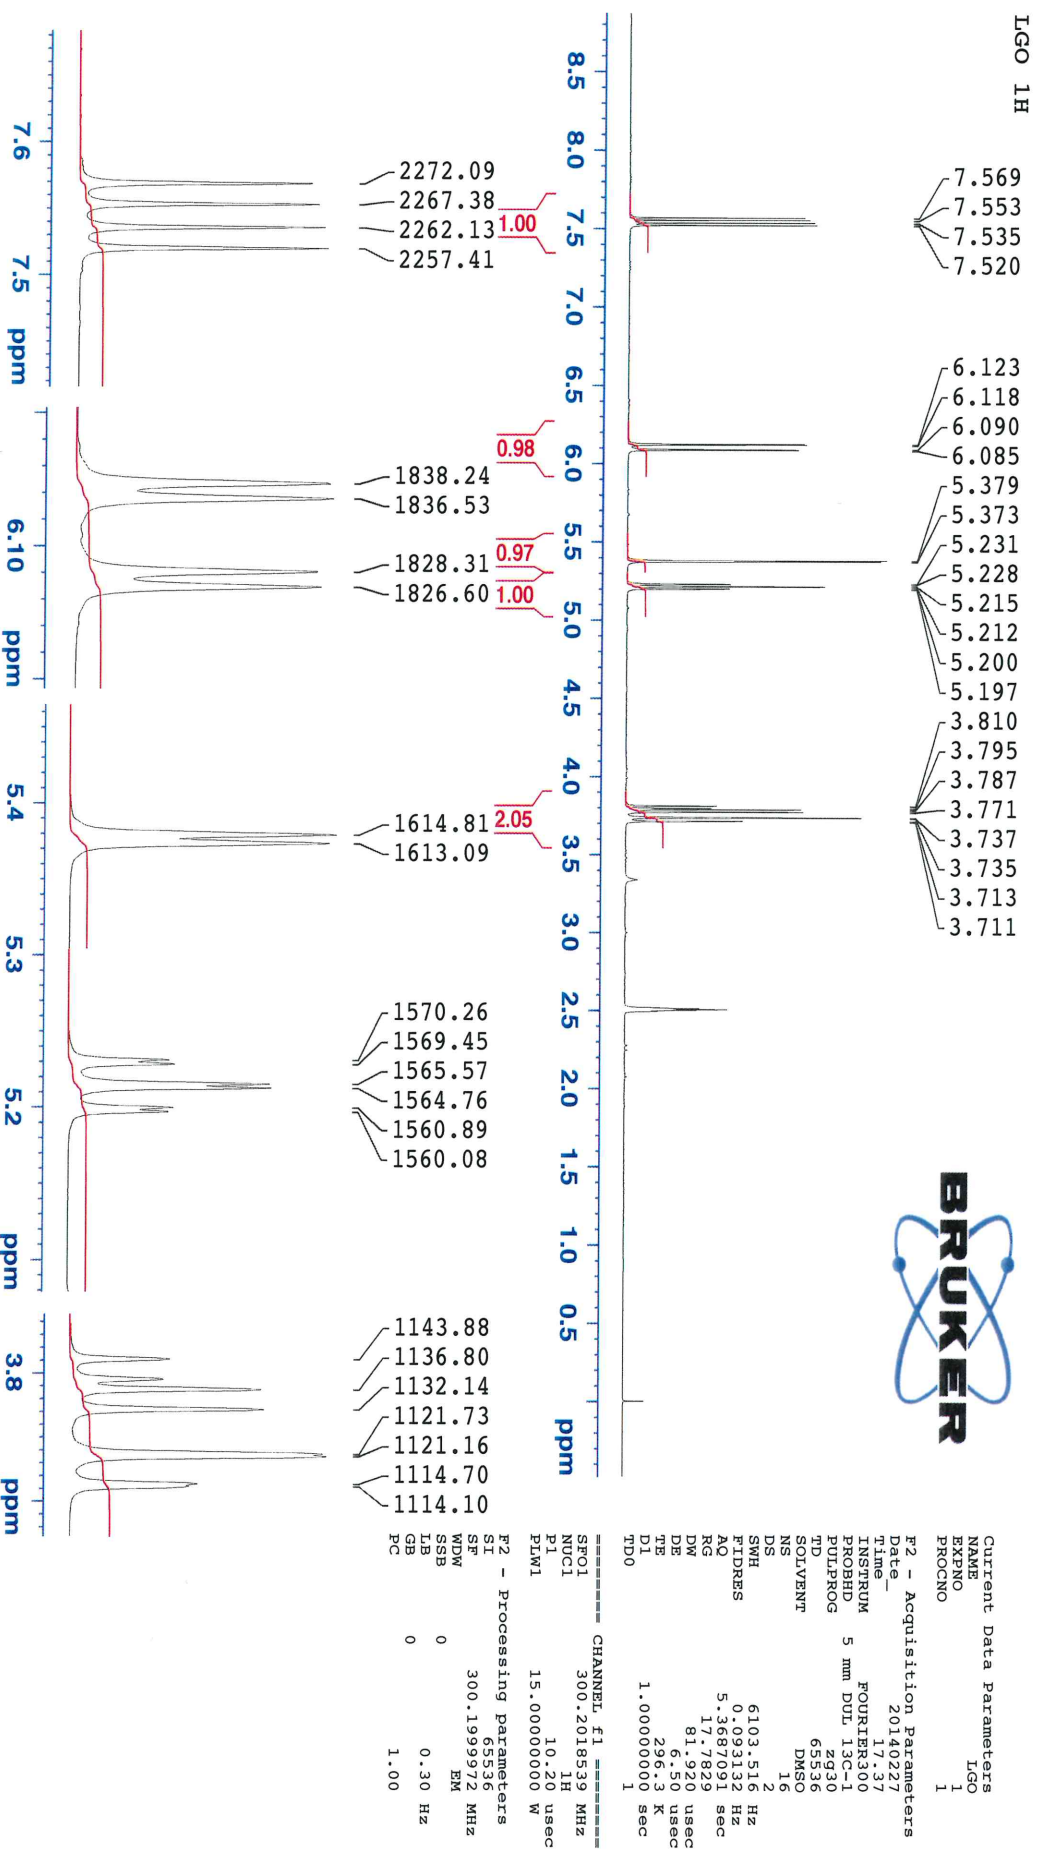

<sup>13</sup>C NMR spectrum of industrial grade levoglucosenone (LGO)

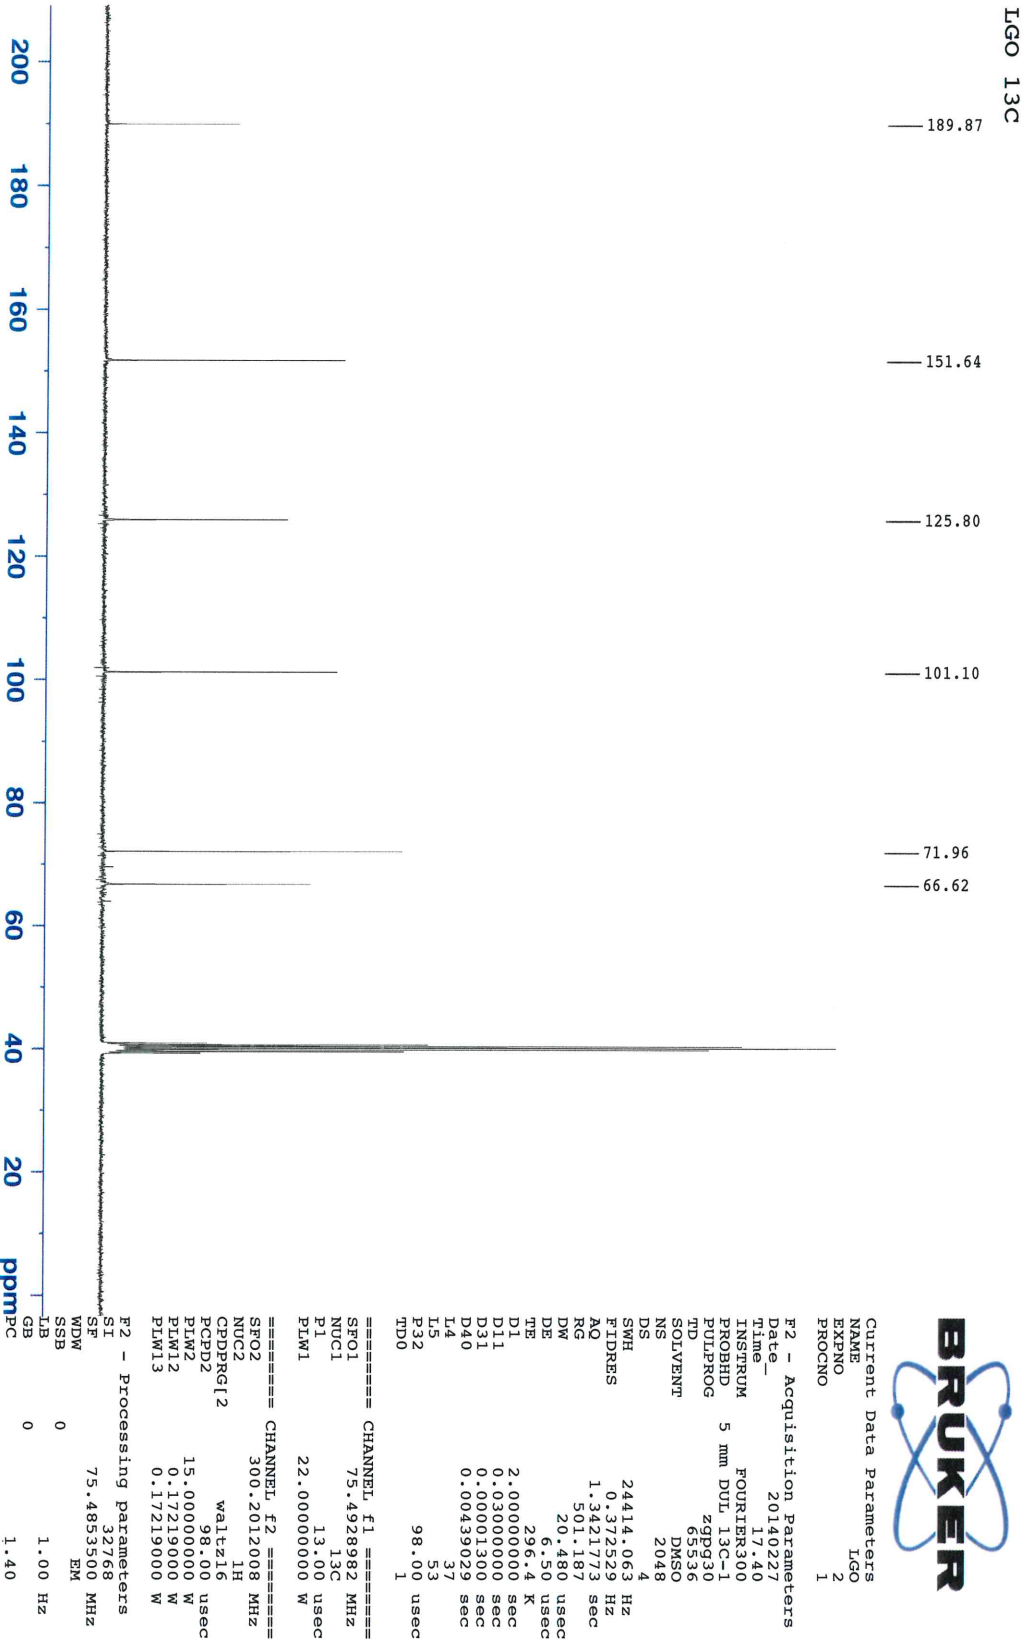

FT-IR spectrum of (S)- $\gamma$ -hydroxymethyl- $\alpha,\beta$ -butenolide (HBO)

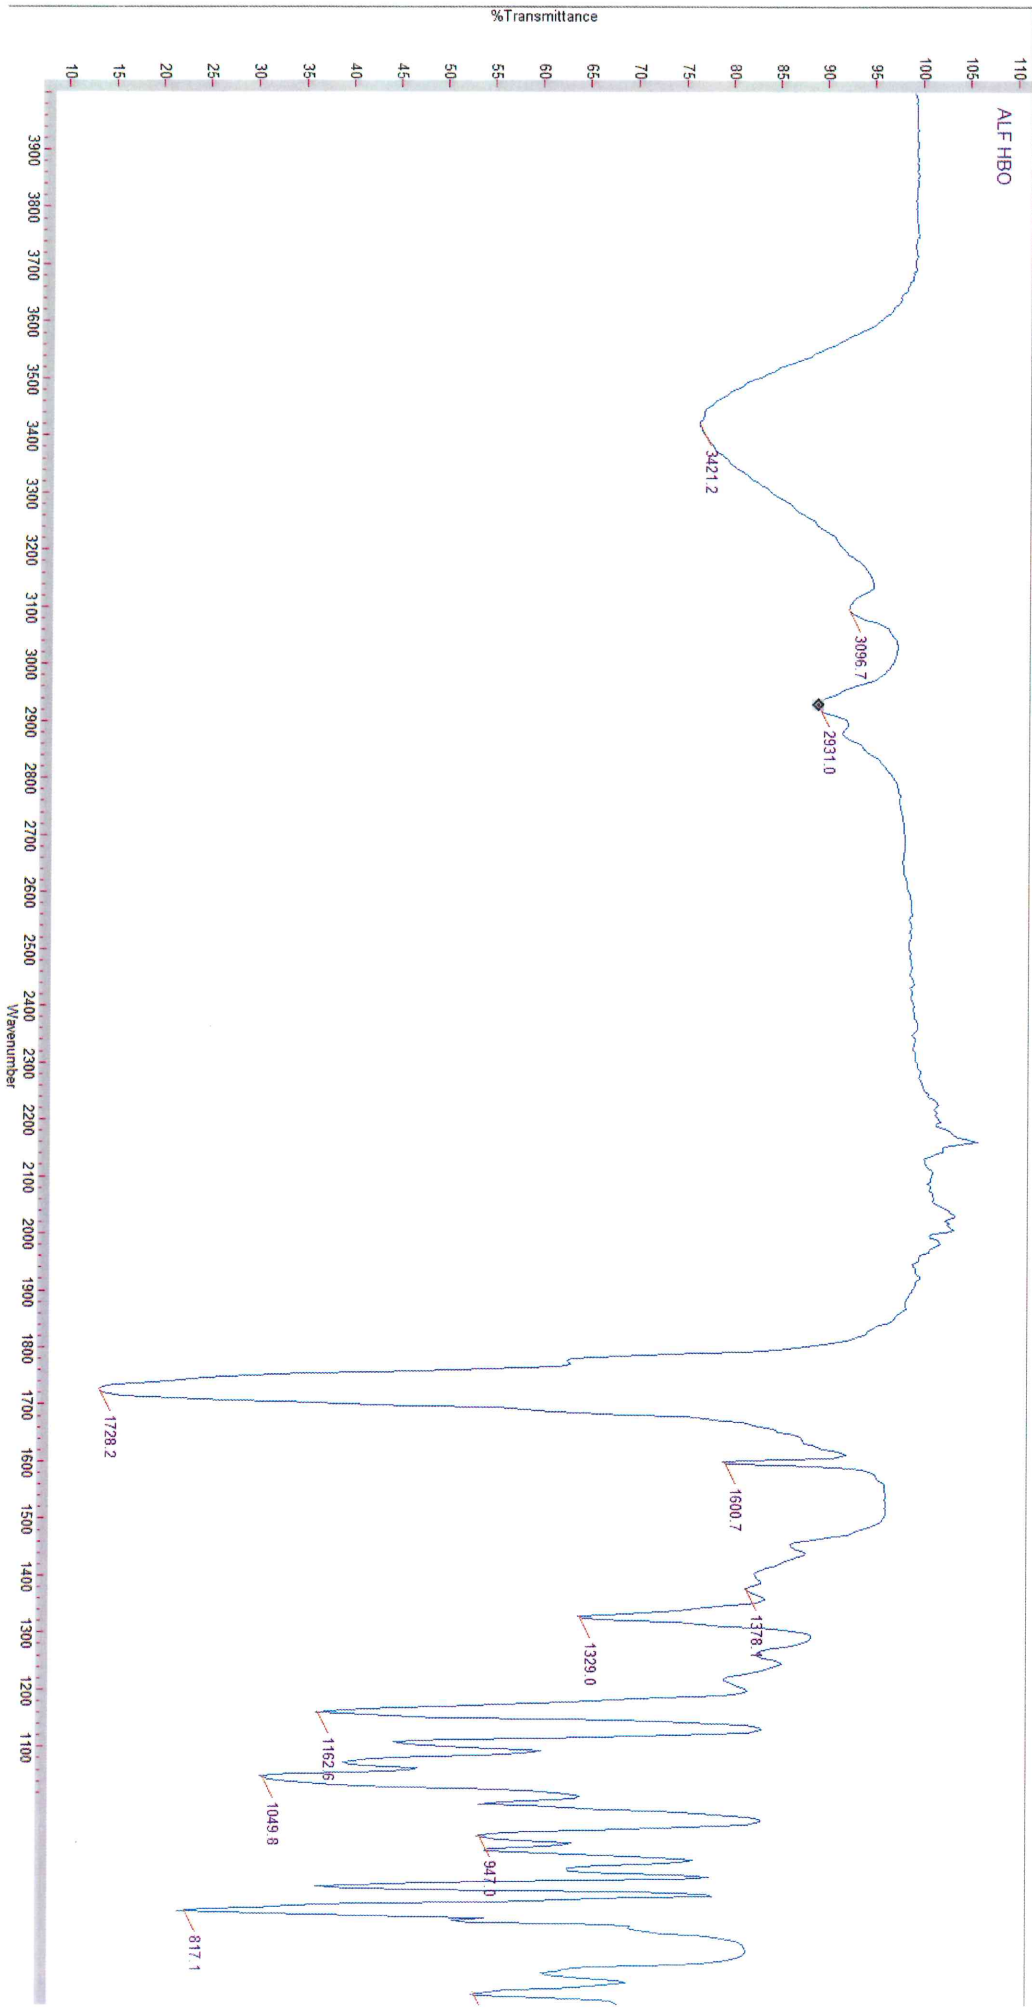

# <sup>1</sup>H NMR spectrum of (S)-γ-hydroxymethyl-α,β-butenolide (HBO)

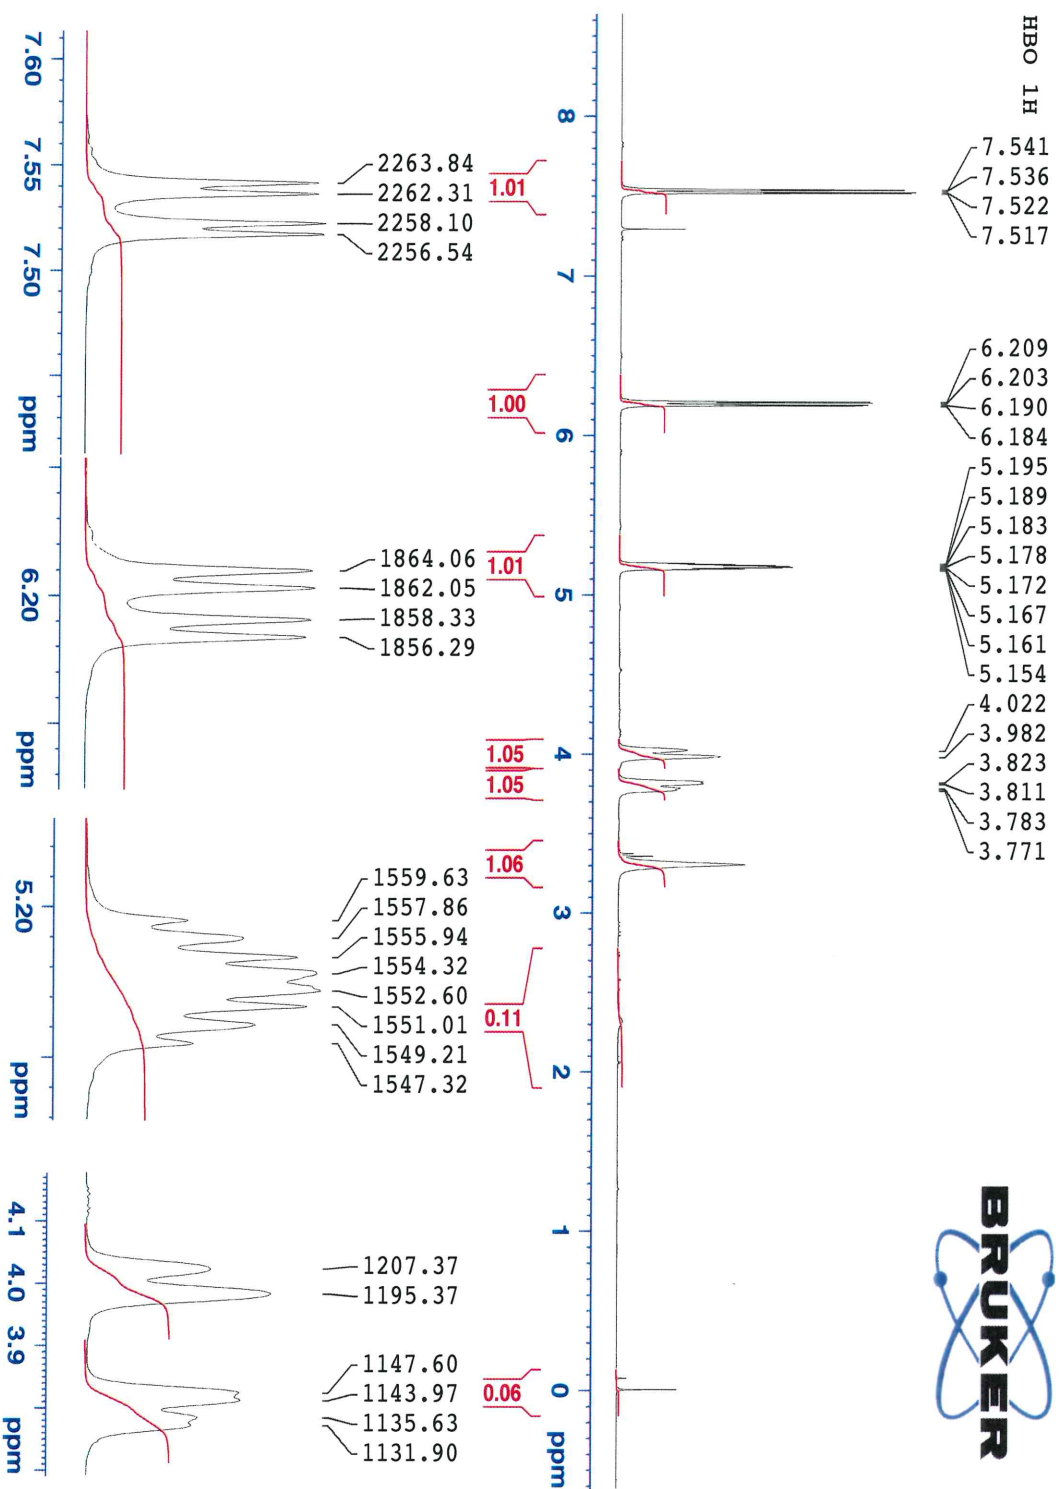

Current Data Parameters  
NAME APE-HBO-P-1H  
EXPNO 1  
PROCNO 1  
F2 - Acquisition Parameters  
Date\_ 20140417  
Time 14.33  
INSTRUM FOURIER300  
PROBHD 5 mm DUL 13C-1  
PULPROG zg30  
TD 65536  
SOLVENT CDCl3  
NS 16  
DS 2  
SWH 6103.516 Hz  
FIDRES 0.093132 Hz  
AQ 5.3687091 sec  
RG 20.0457  
DW 81.920 usec  
DE 6.50 usec  
TE 297.2 K  
D1 1.00000000 sec  
TDO 1  
===== CHANNEL f1 =====  
SFO1 300.2018539 MHz  
NUC1 1H  
P1 10.20 usec  
PLW1 15.00000000 W  
F2 - Processing parameters  
SI 65536  
SF 300.1999945 MHz  
WDW EM  
SSB 0  
LB 0.30 Hz  
GB 0  
PC 1.00



**<sup>13</sup>C NMR spectrum of (S)-γ-hydroxymethyl-α,β-butenolide (HBO)**

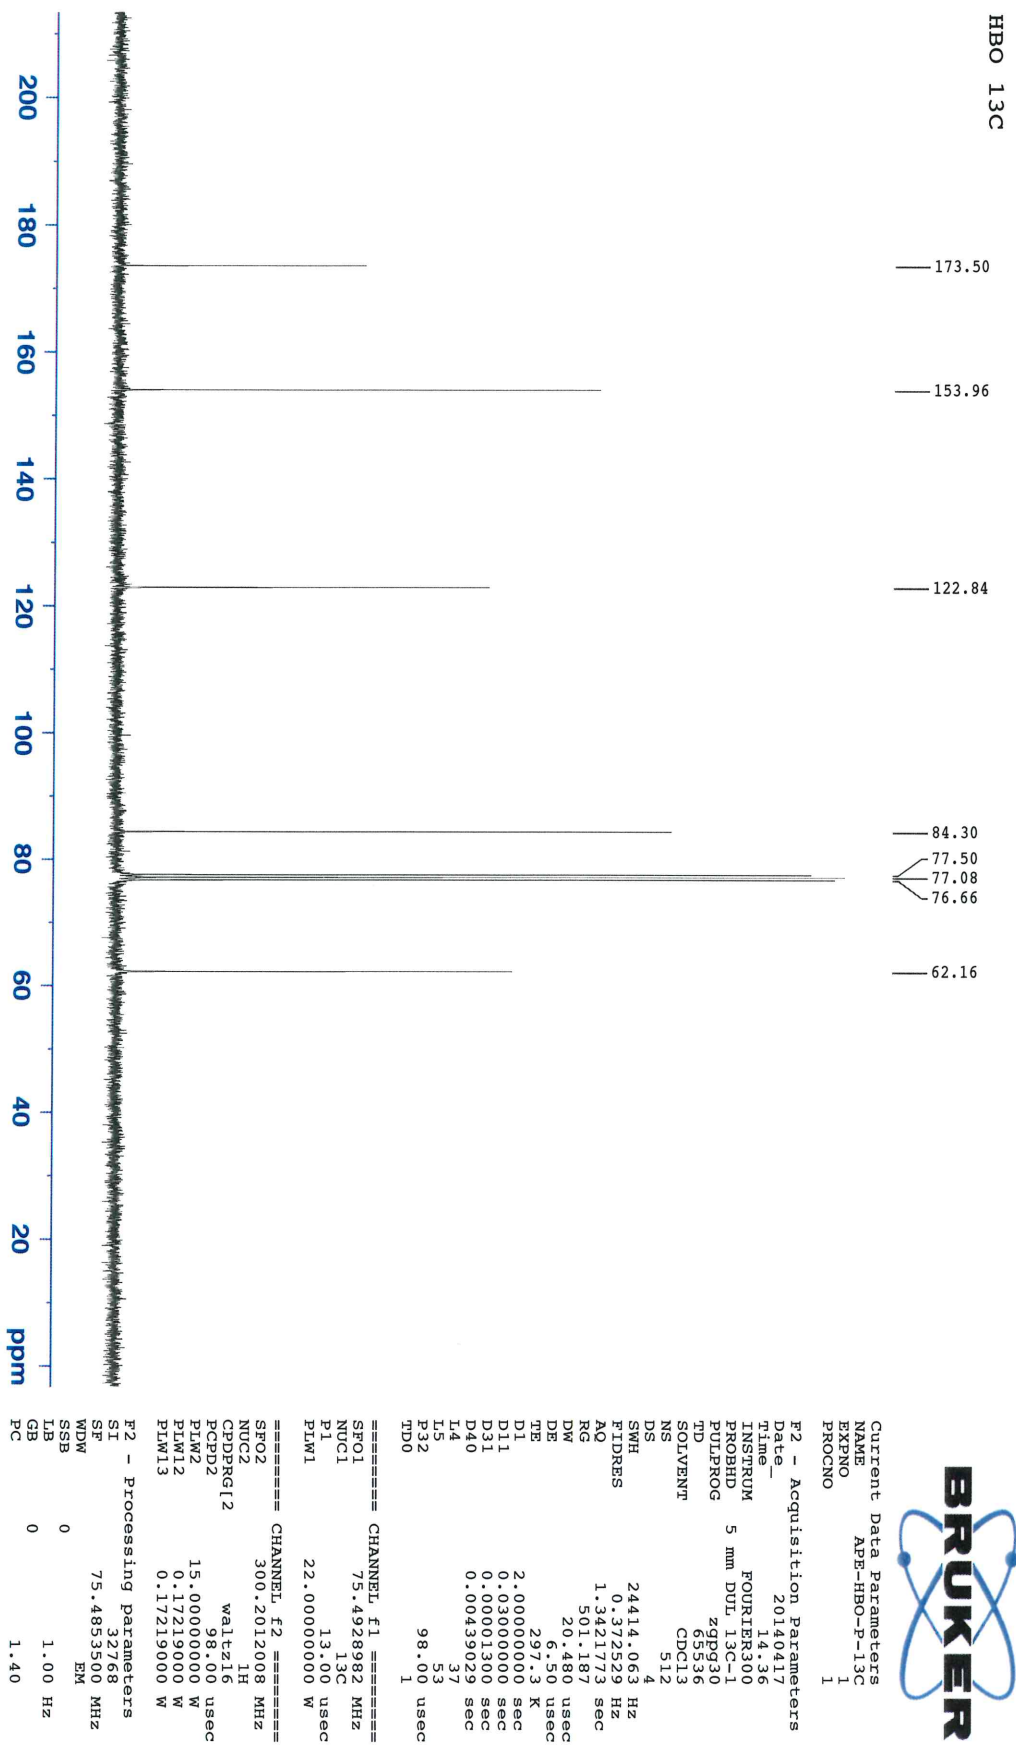

**FT-IR spectrum of 2,3-dehydro levoglucosenone (2H-LGO)**

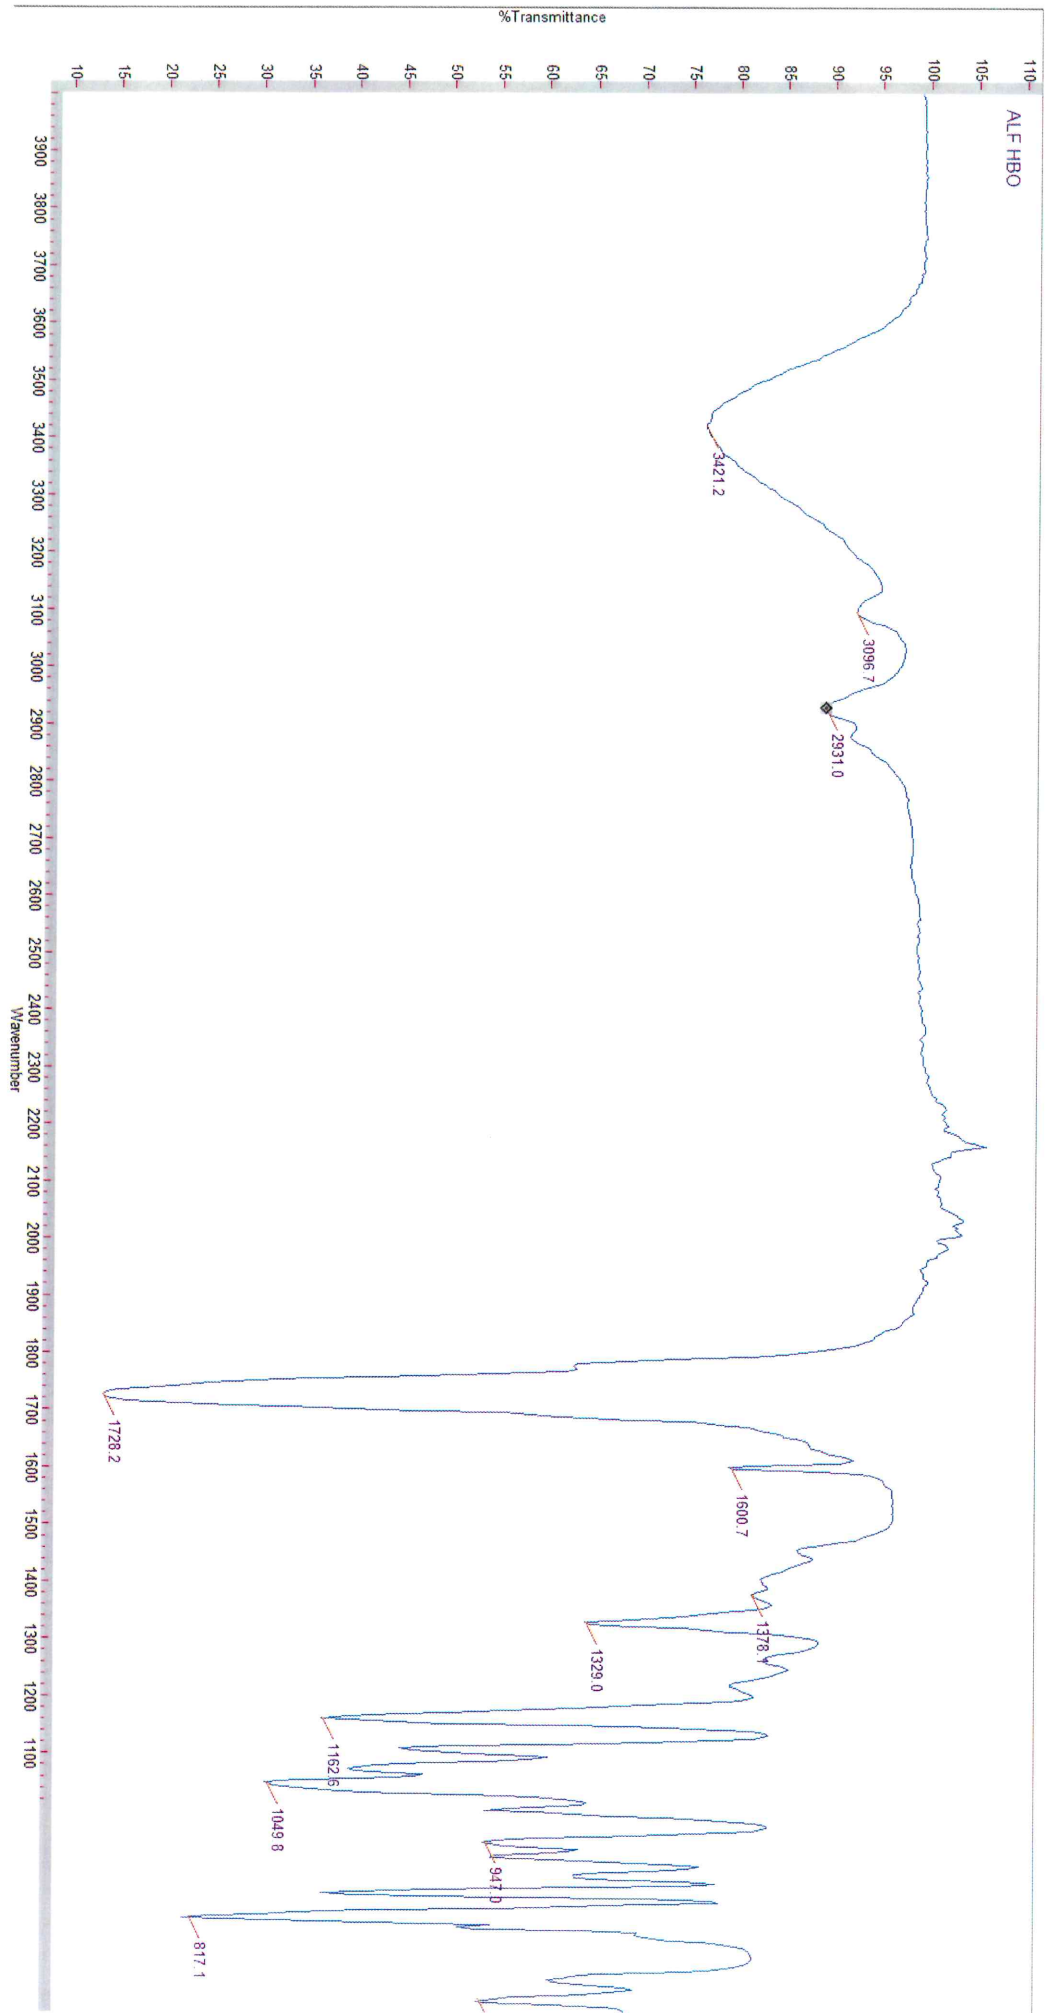

# <sup>1</sup>H NMR spectrum of 2,3-dehydro levoglucosenone (2H-LGO)

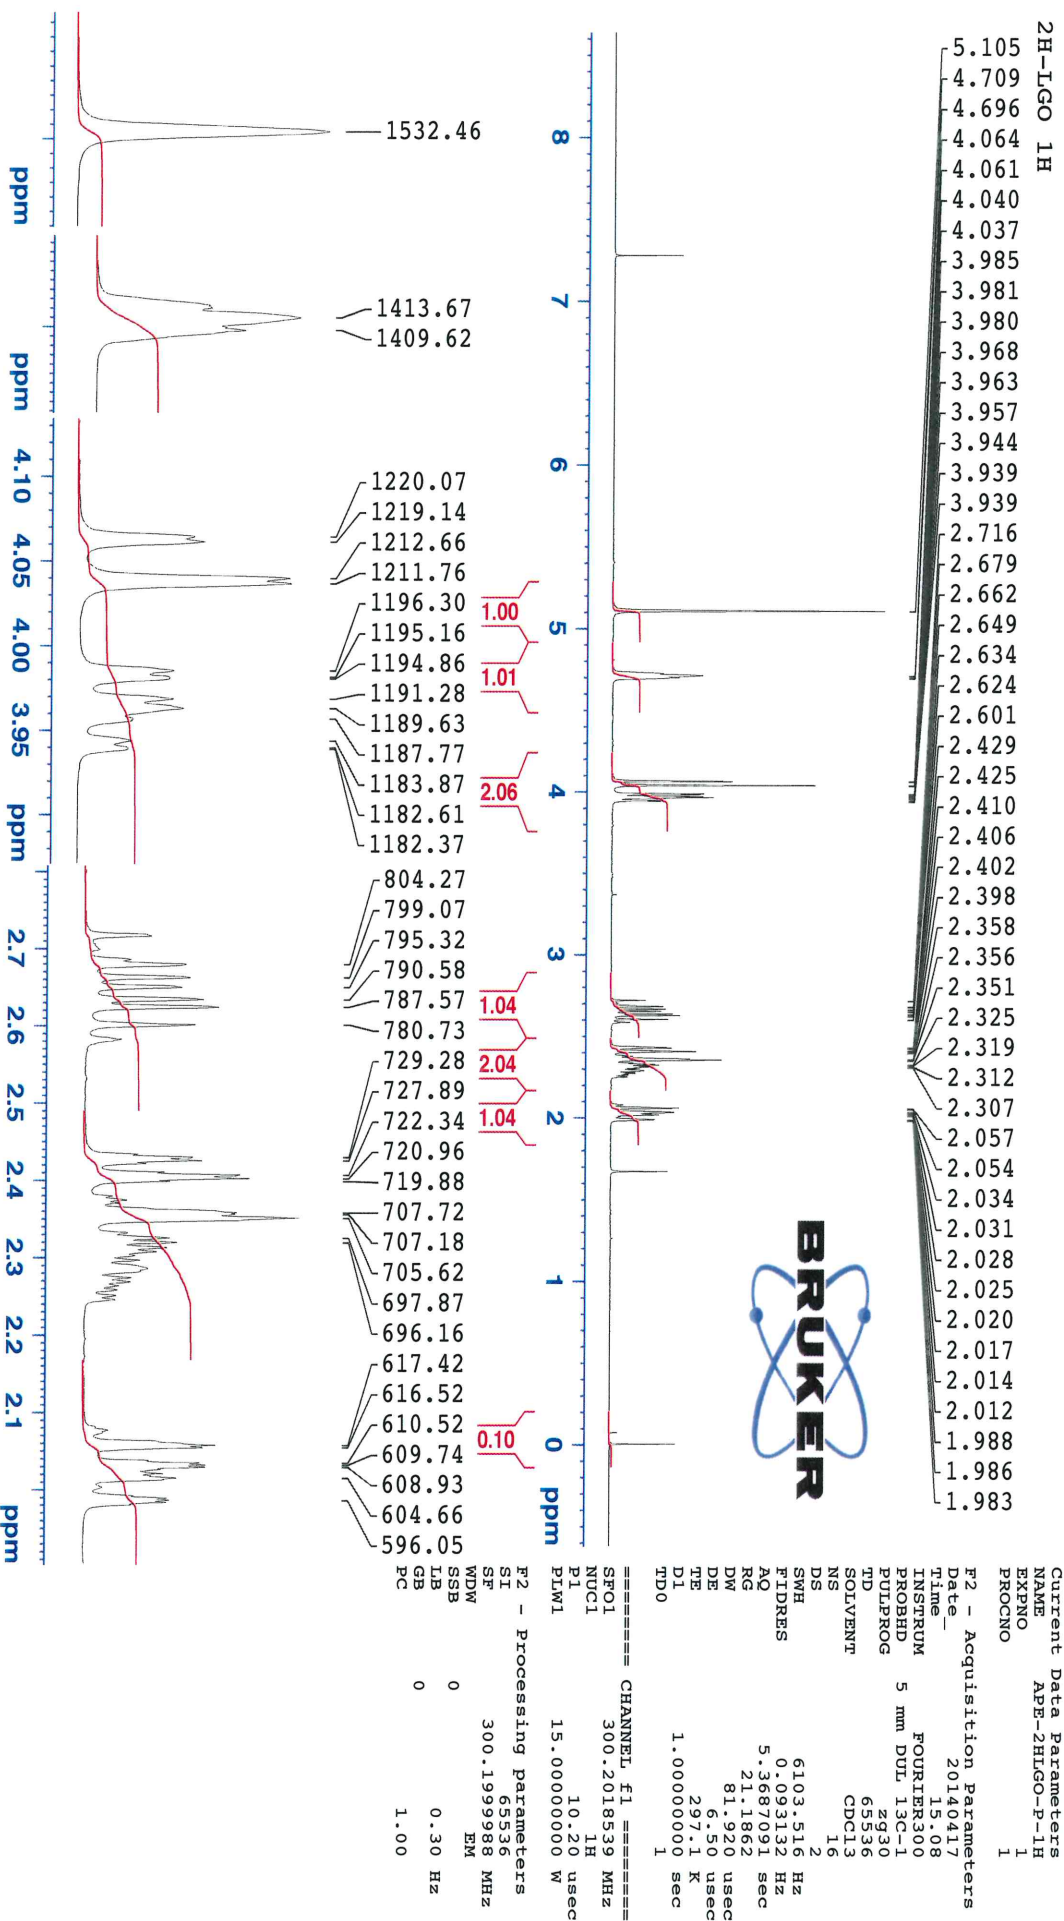



**<sup>13</sup>C NMR spectrum of 2,3-dehydro levoglucosenone (2H-LGO)**

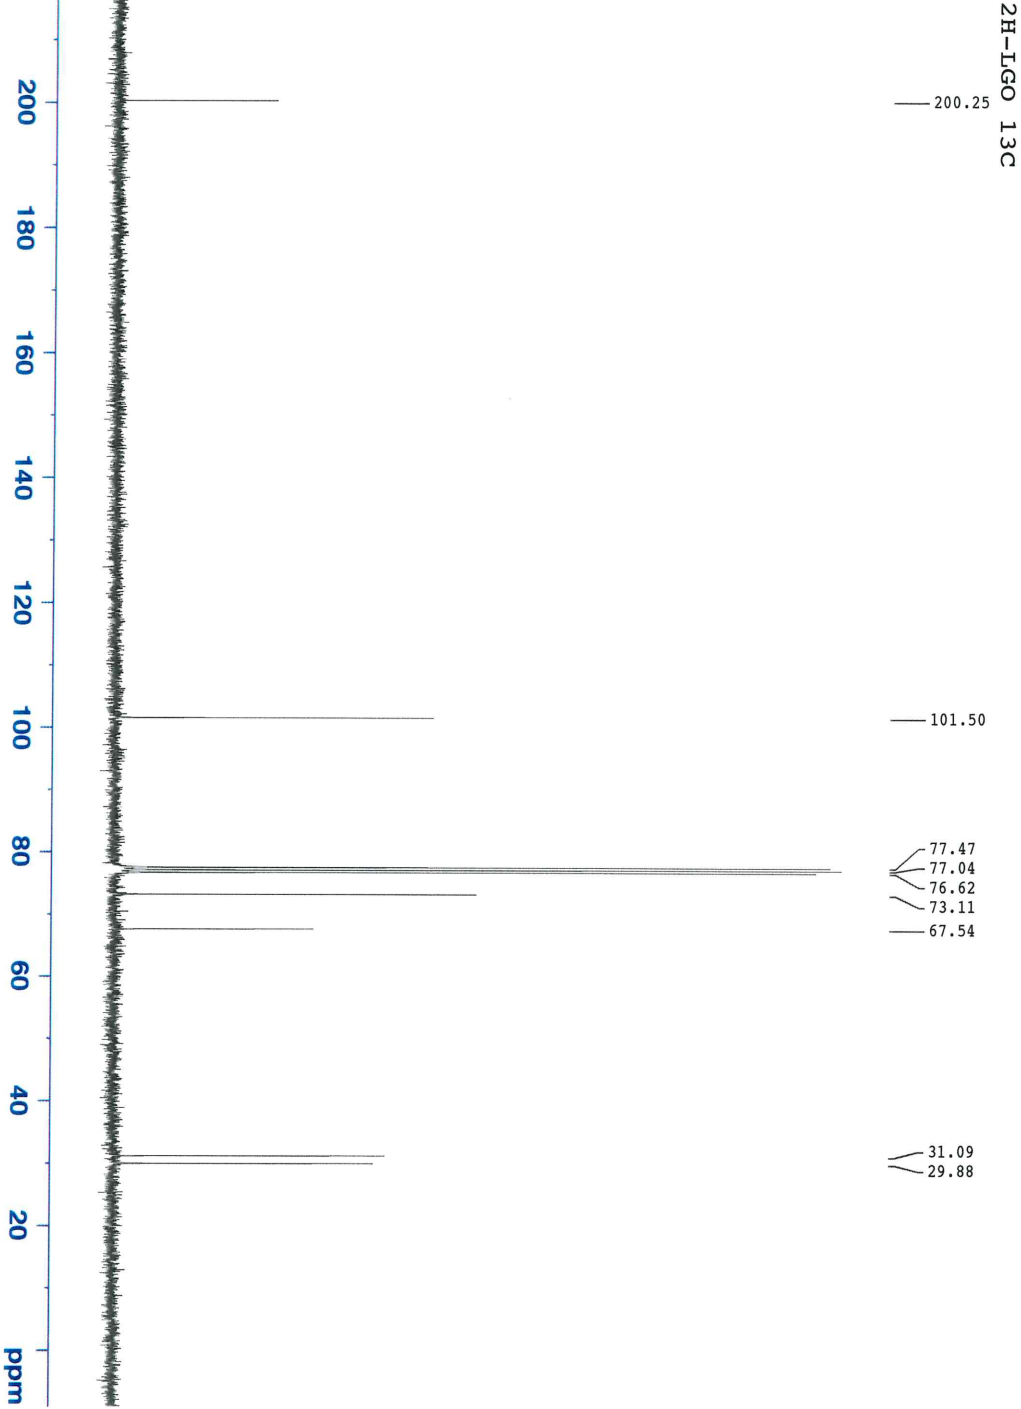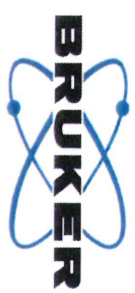

Current Data Parameters  
NAME APE-2H-LGO-P-13C  
EXPNO 10  
PROCNO 1

F2 - Acquisition Parameters  
Date\_ 20140417  
Time 15.11  
INSTRUM FOURIER300  
PROBHD 5 mm DUL 13C-1  
PULPROG zgpg30  
TD 65536  
SOLVENT CDCl3  
NS 512  
DS 4  
SWH 24414.063 Hz  
FIDRES 0.372529 Hz  
AQ 1.3421773 sec  
RG 501.187  
DW 20.480 usec  
DE 6.50 usec  
TE 297.1 K  
D1 2.00000000 sec  
D11 0.03000000 sec  
D31 0.00001300 sec  
D40 0.00439029 sec  
T4 37  
T5 33  
P32 98.00 usec  
TD0 1

===== CHANNEL f1 =====  
SFO1 75.4928982 MHz  
NUC1 13C  
P1 13.00 usec  
PLW1 22.00000000 W

===== CHANNEL f2 =====  
SFO2 300.2012008 MHz  
NUC2 1H  
CPDPRG2 waltz16  
PCPD2 98.00 usec  
PLW2 15.00000000 W  
PLW12 0.17219000 W  
PLW13 0.17219000 W

F2 - Processing Parameters  
SI 32768  
SF 75.4853500 MHz  
WDW EM  
SSB 0  
LB 1.00 Hz  
GB 0  
PC 1.40

**FT-IR spectrum of (S)- $\gamma$ -hydroxymethyl- $\gamma$ -butyrolactone (2H-HBO)**

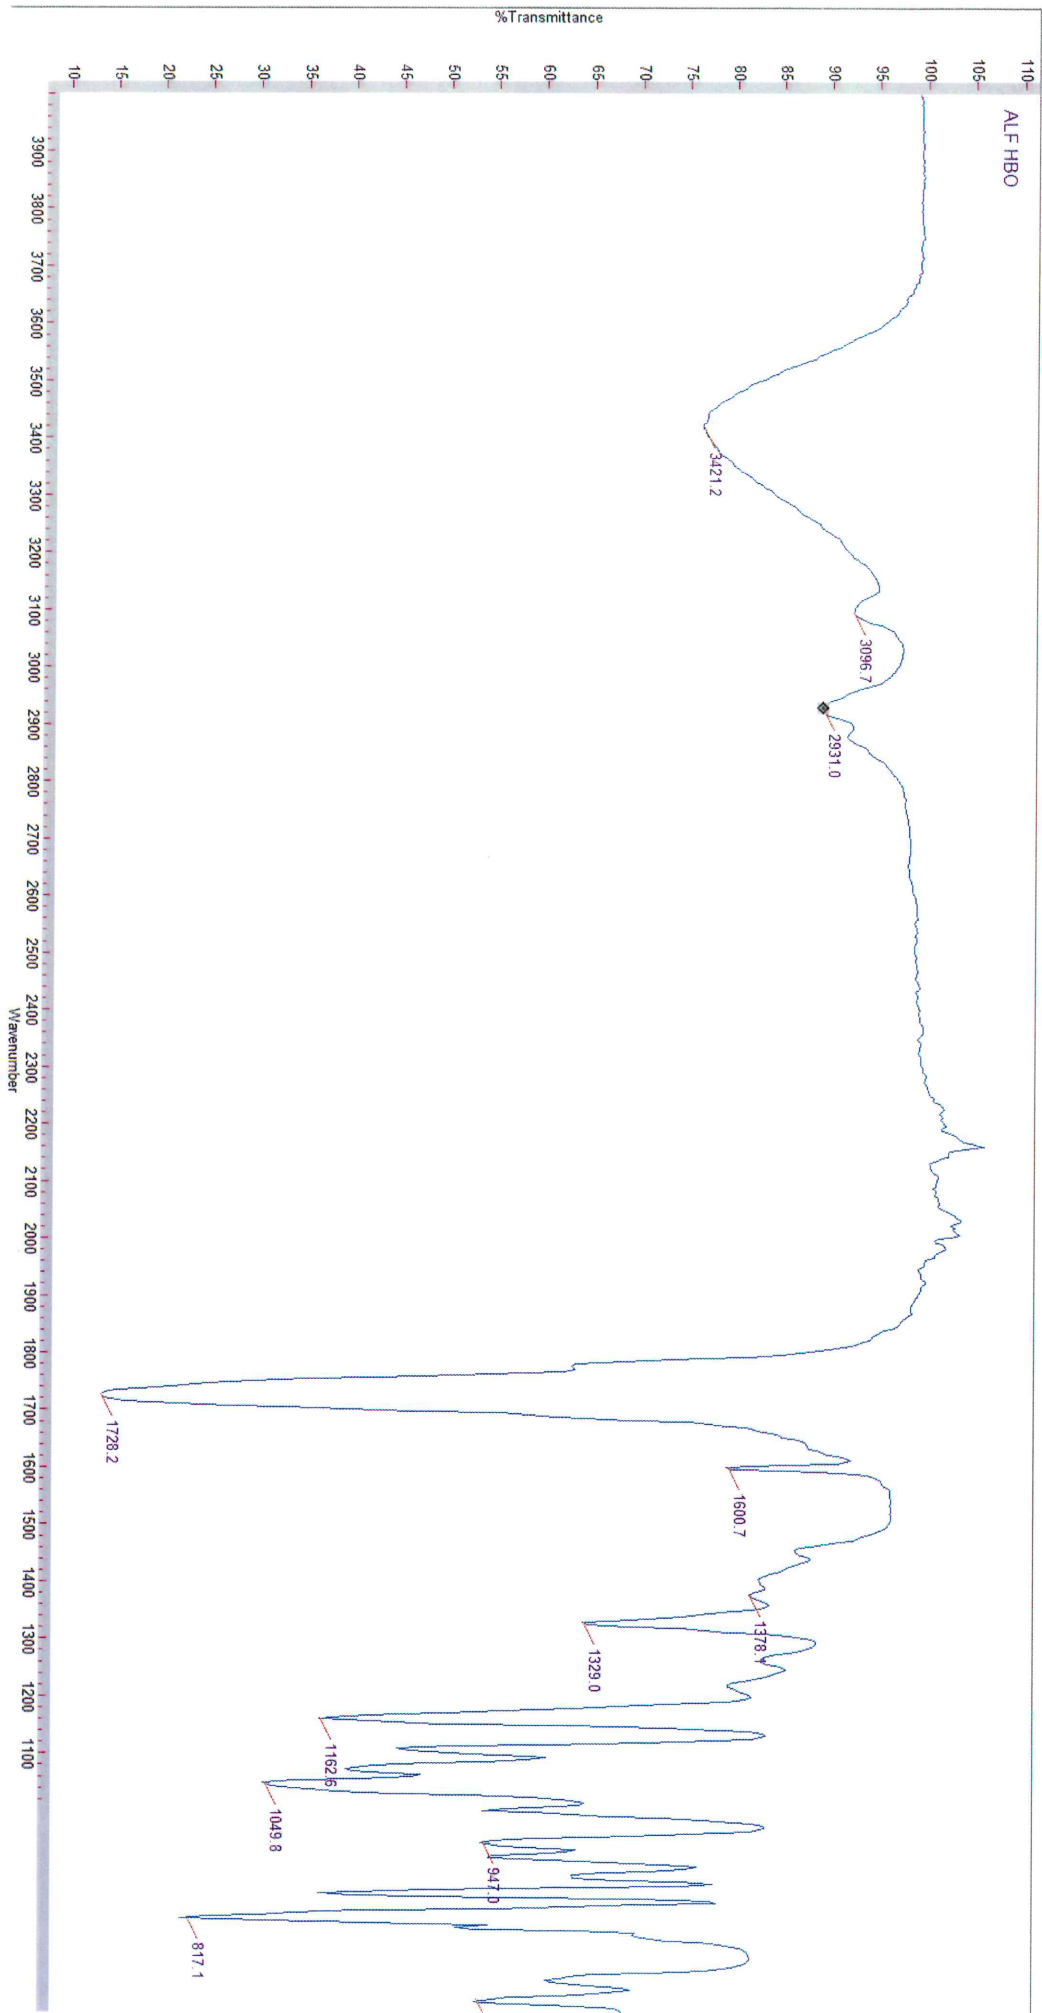

# <sup>1</sup>H NMR spectrum of (S)-γ-hydroxymethyl-γ-butyrolactone (2H-HBO)

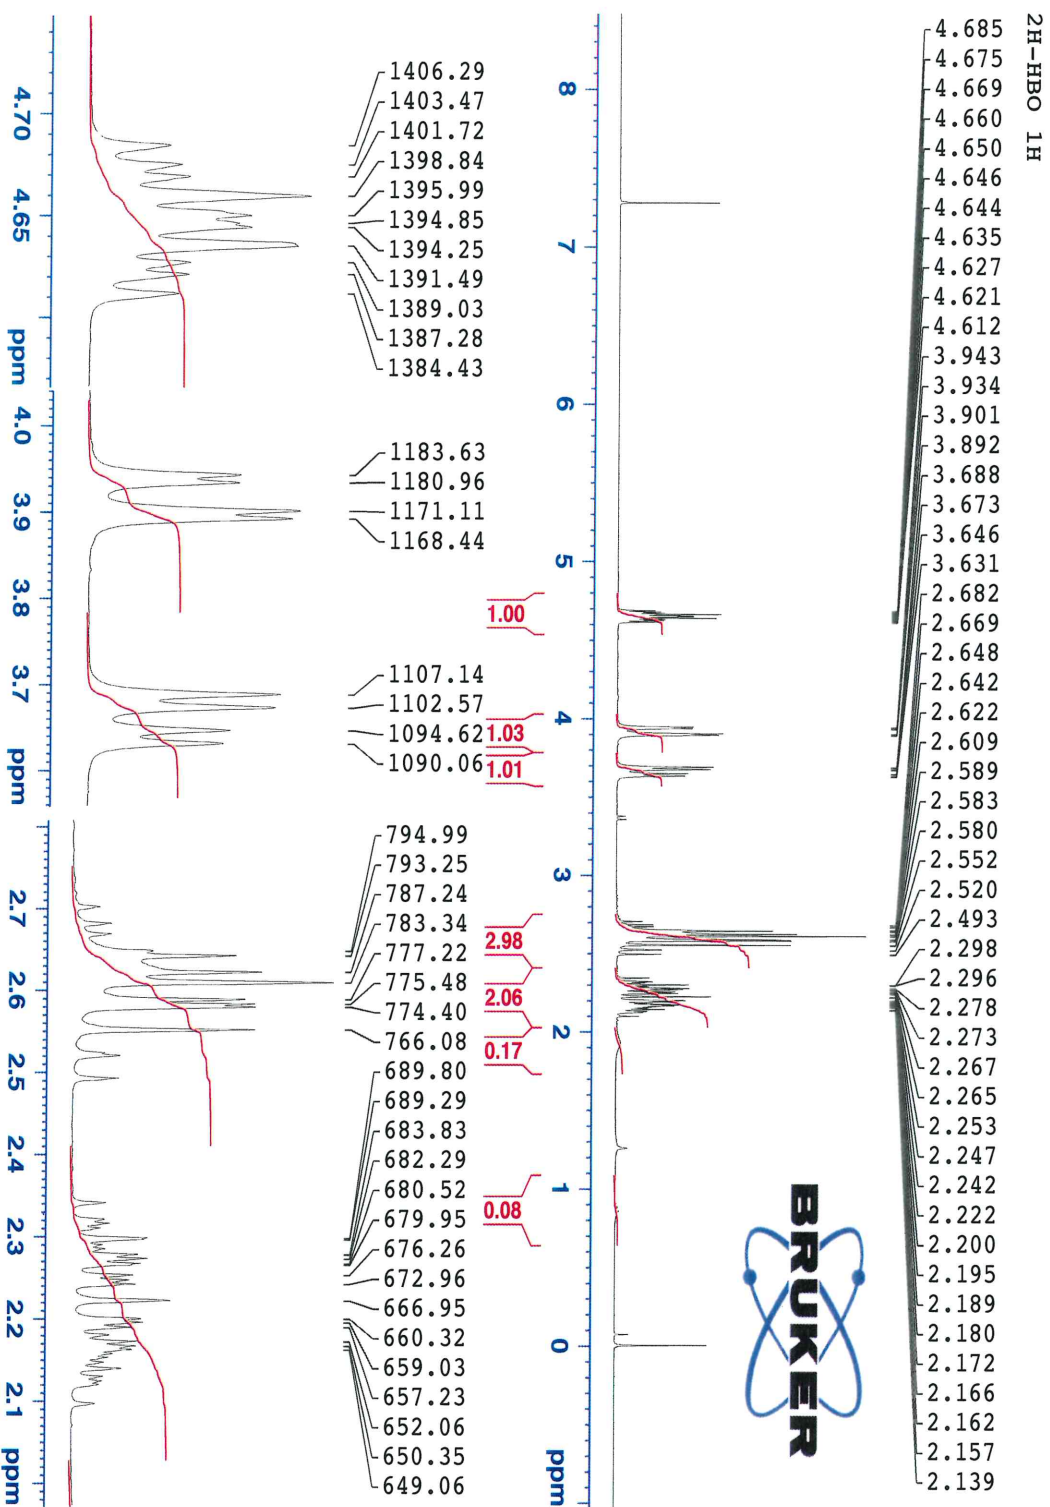

Current Data Parameters  
NAME APE-2HHBO-P-1H  
EXPNO 1  
PROCNO 1  
F2 - Acquisition Parameters  
Date\_ 20140418  
Time 11.18  
INSTRUM FOURIER300  
PROBHD 5 mm DUL 13C-1  
PULPROG zg30  
TD 65536  
SOLVENT CDCl3  
NS 16  
DS 2  
SWH 6103.516 Hz  
FIDRES 0.093132 Hz  
AQ 5.3687091 sec  
RG 25.1803  
DW 81.920 usec  
DE 6.50 usec  
TE 294.6 K  
D1 1.00000000 sec  
TDO 1

===== CHANNEL f1 =====  
SFO1 300.2018539 MHz  
NUC1 1H  
P1 10.20 usec  
PLW1 15.00000000 W

F2 - Processing parameters  
SI 65536  
SF 300.1999986 MHz  
WDW EM  
SSB 0  
LB 0.30 Hz  
GB 0  
PC 1.00

<sup>13</sup>C NMR spectrum of (S)-γ-hydroxymethyl-γ-butyrolactone (2H-HBO)

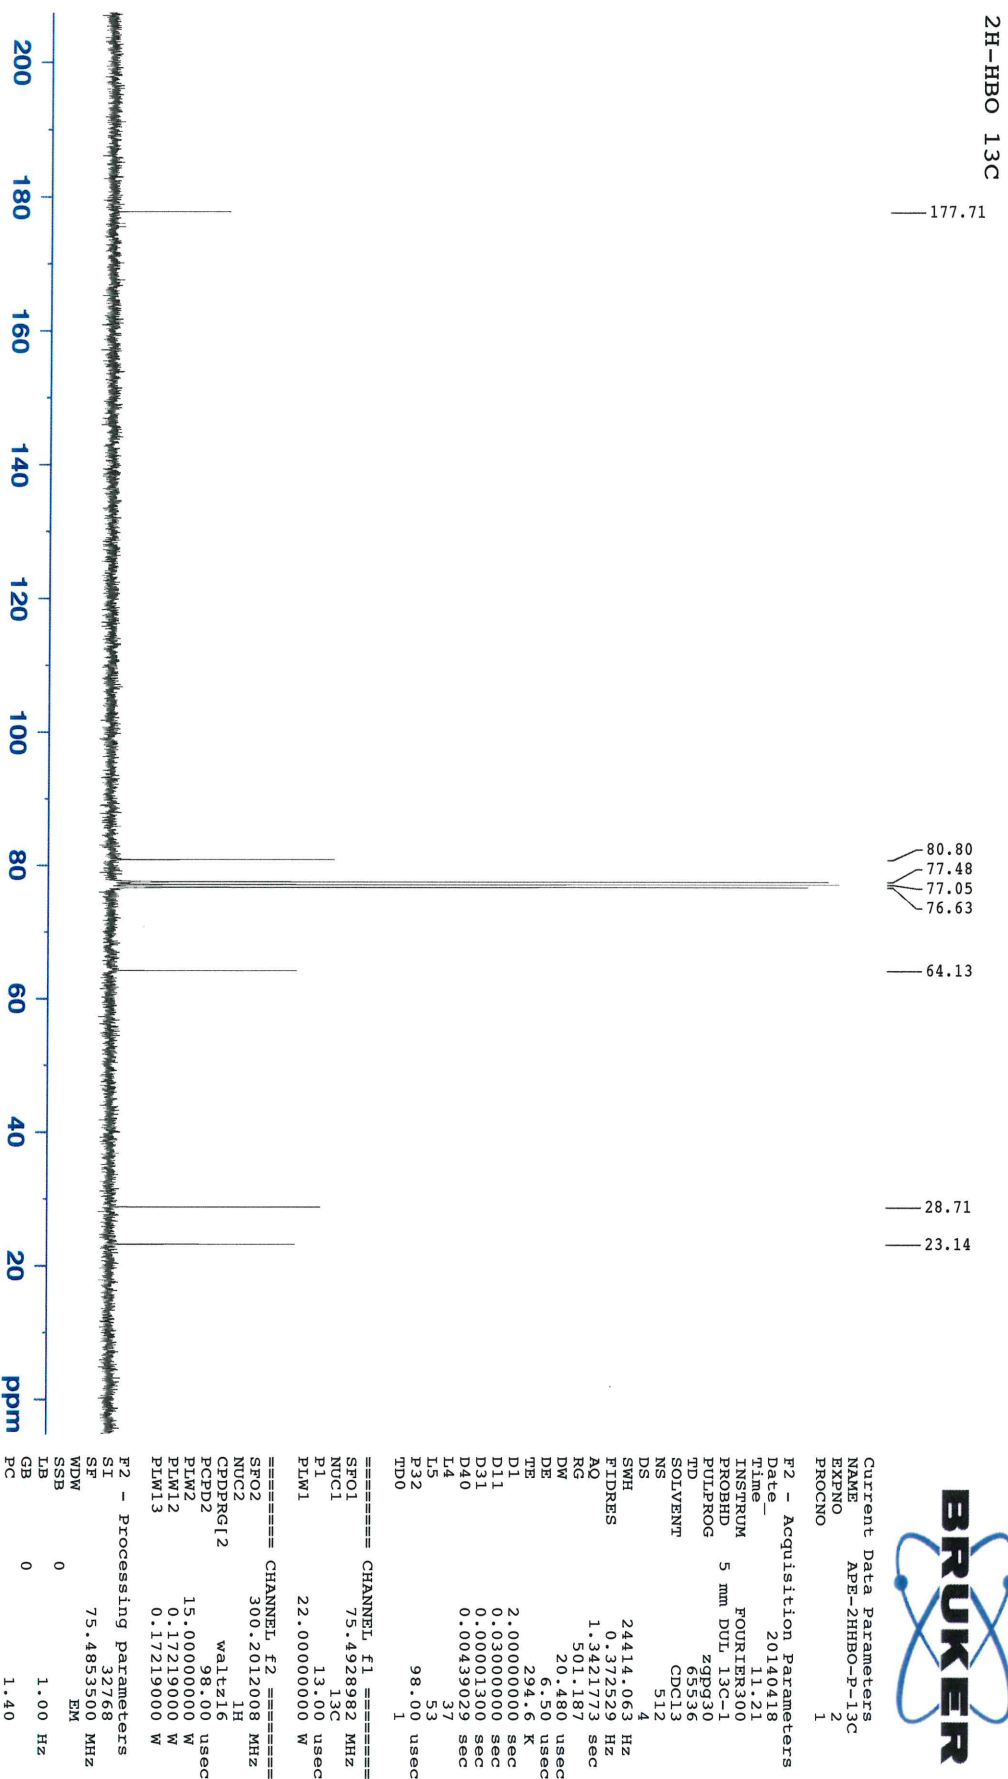

Supplement: c4gc01231c1.pdf [file c4gc01231c1.pdf]
